# Supplementary material for: Immunogenicity and safety of three aluminium hydroxide adjuvanted vaccines with reduced doses of inactivated polio vaccine (IPV-Al) compared with standard IPV in young infants in the Dominican Republic: a phase 2, non-inferiority, observer-blinded, randomised, and controlled dose investigation trial
Source: PubMed Central journal article supplement (PMC5483484; doi:10.1016/s1473-3099(17)30177-9), 2017-07

# THE LANCET Infectious Diseases

## Supplementary webappendix

This webappendix formed part of the original submission and has been peer reviewed. We post it as supplied by the authors.

Supplement to: Rivera L, Pedersen RS, Peña L, et al. Immunogenicity and safety of three aluminium hydroxide adjuvanted vaccines with reduced doses of inactivated polio vaccine (IPV-AI) compared with standard IPV in young infants in the Dominican Republic: a phase 2, non-inferiority, observer-blinded, randomised, and controlled dose investigation trial. *Lancet Infect Dis* 2017; published online April 25. [http://dx.doi.org/10.1016/S1473-3099\(17\)30177-9](http://dx.doi.org/10.1016/S1473-3099(17)30177-9).

### Reverse Quantile Diagram of Antibody Titres of Polio Type 1

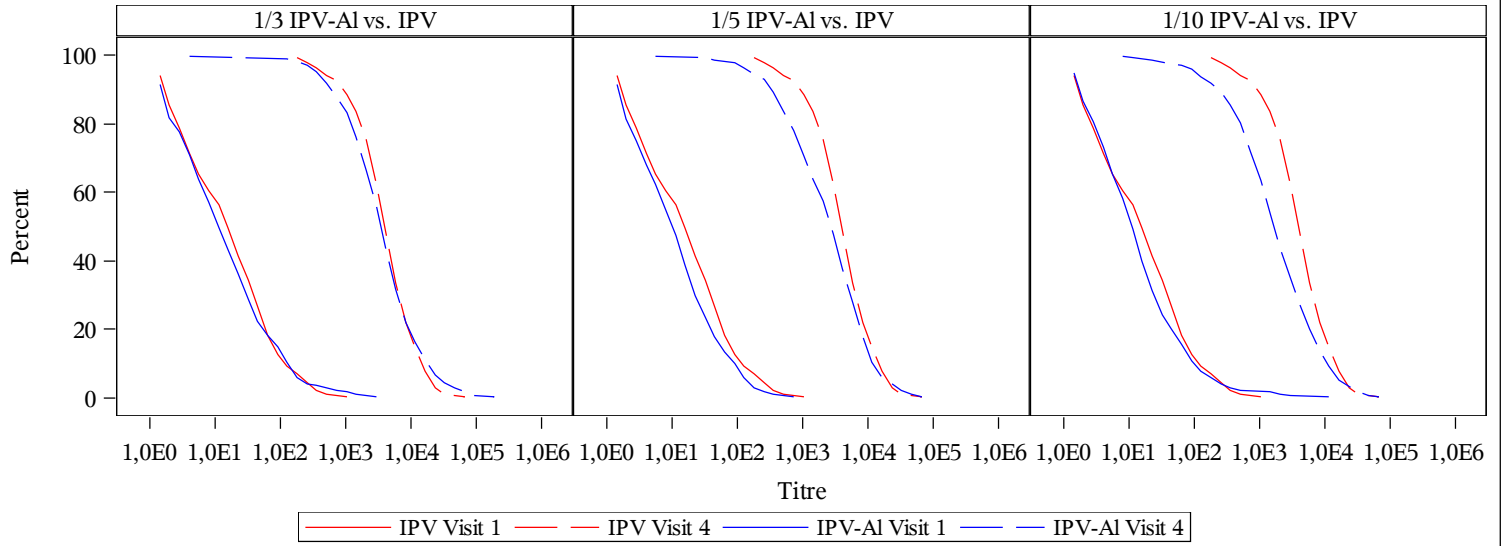

### Reverse Quantile Diagram of Antibody Titres of Polio Type 2

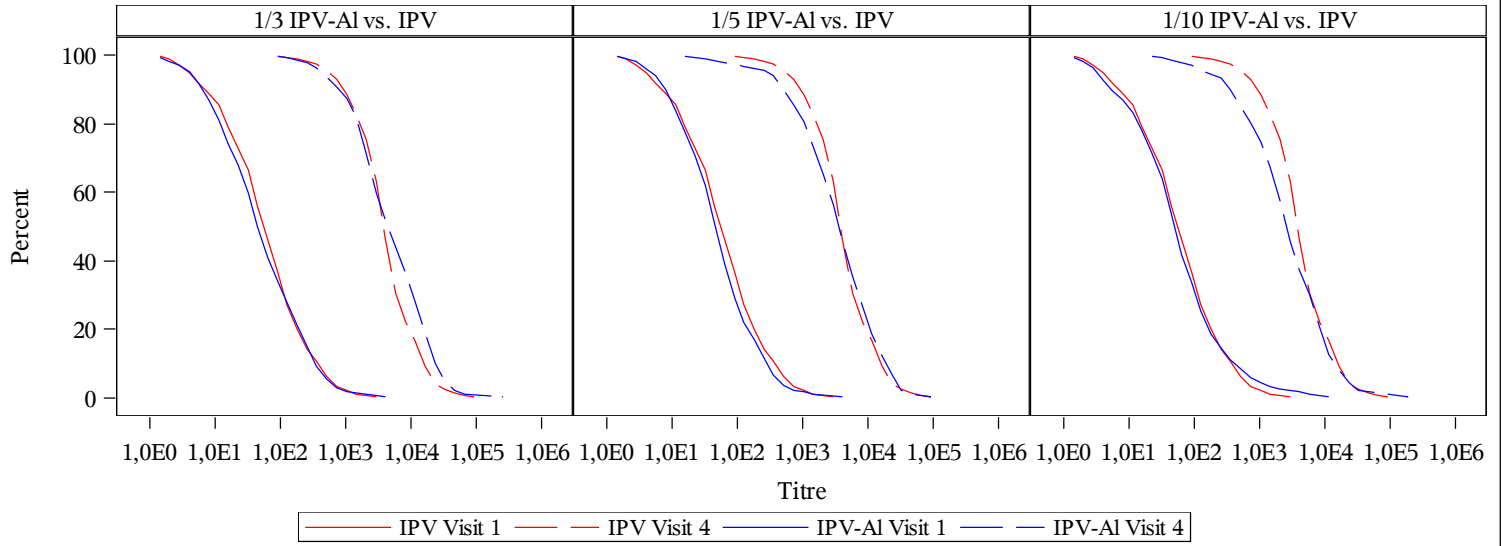

**Reverse Quantile Diagram of Antibody Titres of Polio Type 3**

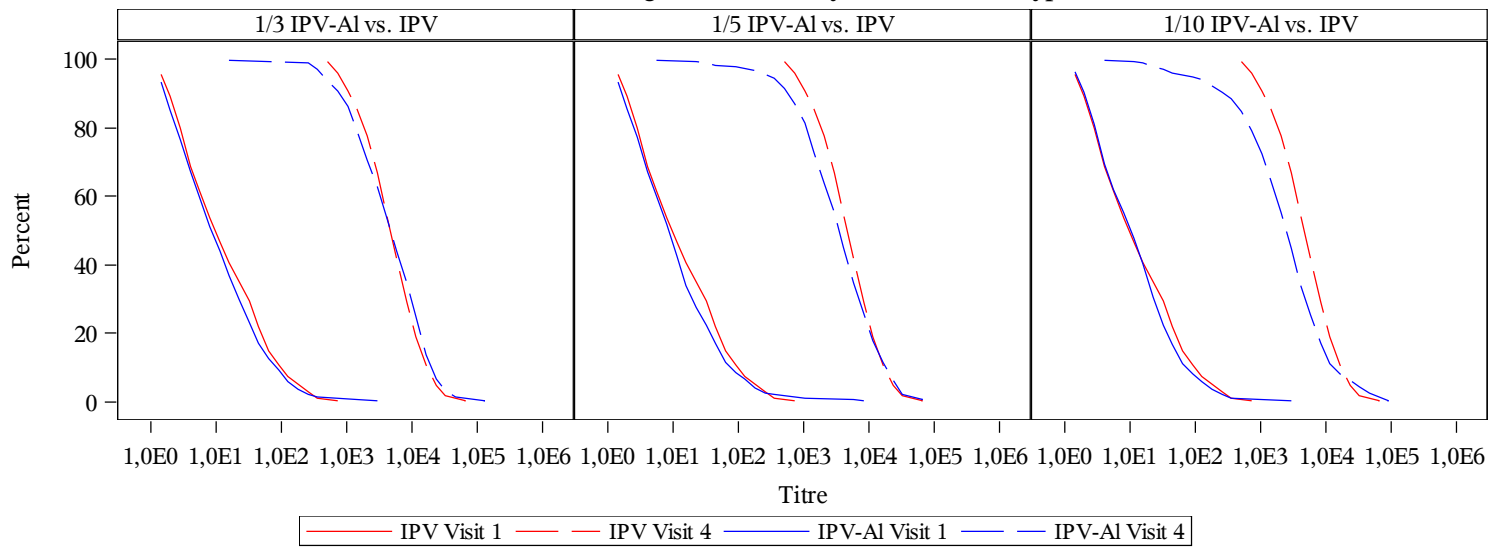

Supplement: mmc1.pdf [file mmc1.pdf]
